# Supplementary material for: Analysis of suicide risk in adult US patients with squamous cell carcinoma: a retrospective study based on the Surveillance, Epidemiology and End Results database
Source: HighWire-hosted journal article supplement (doi:10.1136/bmjopen-2022-061913), 2022-09-01
Supplement: bmjopen-2022-061913supp001_data_supplement.pdf [file bmjopen-2022-061913supp001_data_supplement.pdf]

**Analysis of Suicide Risk in Adult US Patients with Squamous Cell  
Carcinoma: a Retrospective Study Based on the Surveillance,  
Epidemiology, and End Results Database**

**Supplement Online**

**eFigure legends**

eFigure 1. The flow diagram of squamous cell carcinoma patients selection.

eFigure 2. The distribution of patients with squamous cell carcinoma by age.

eFigure 3. The distribution of patients with squamous cell carcinoma by year.

eFigure 4. The distribution of survival months of patients with squamous cell carcinoma in different years.

eFigure 5. Comparison chart of survival curves of male and female squamous cell carcinoma patients.

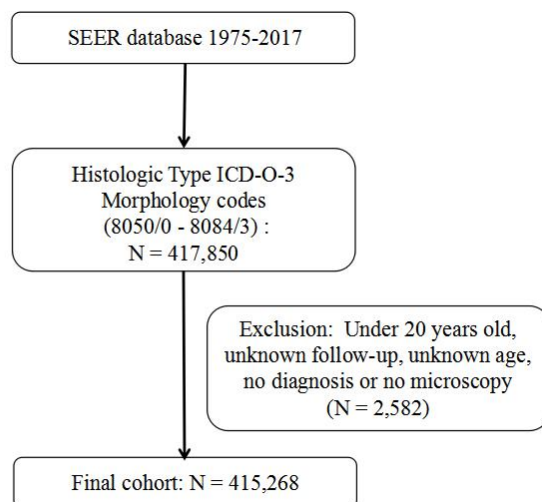

eFigure 1. The flow diagram of squamous cell carcinoma patients selection.

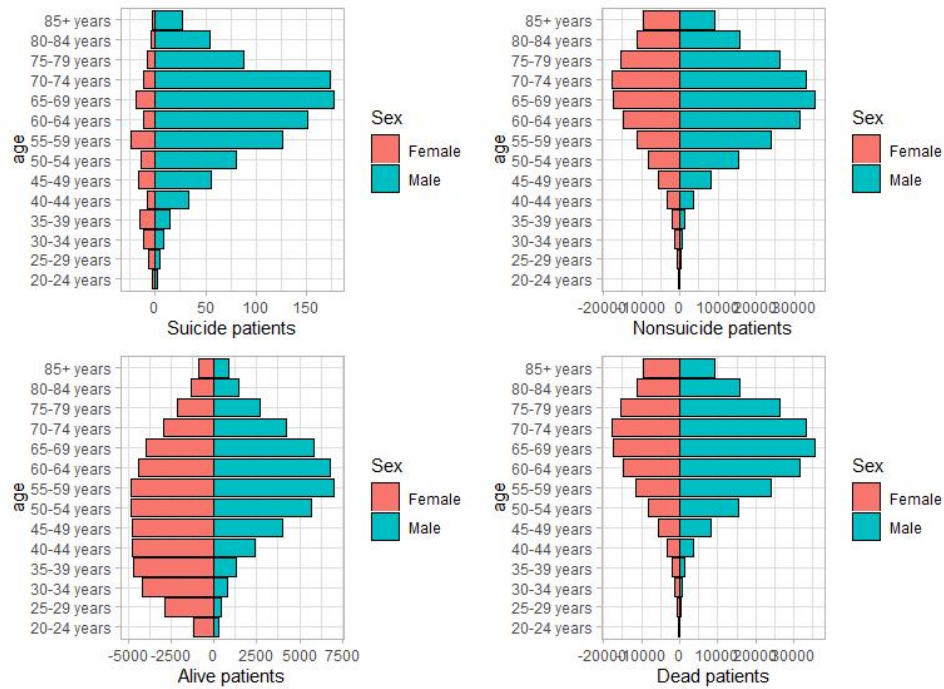

eFigure 2. The distribution of patients with squamous cell carcinoma by age.

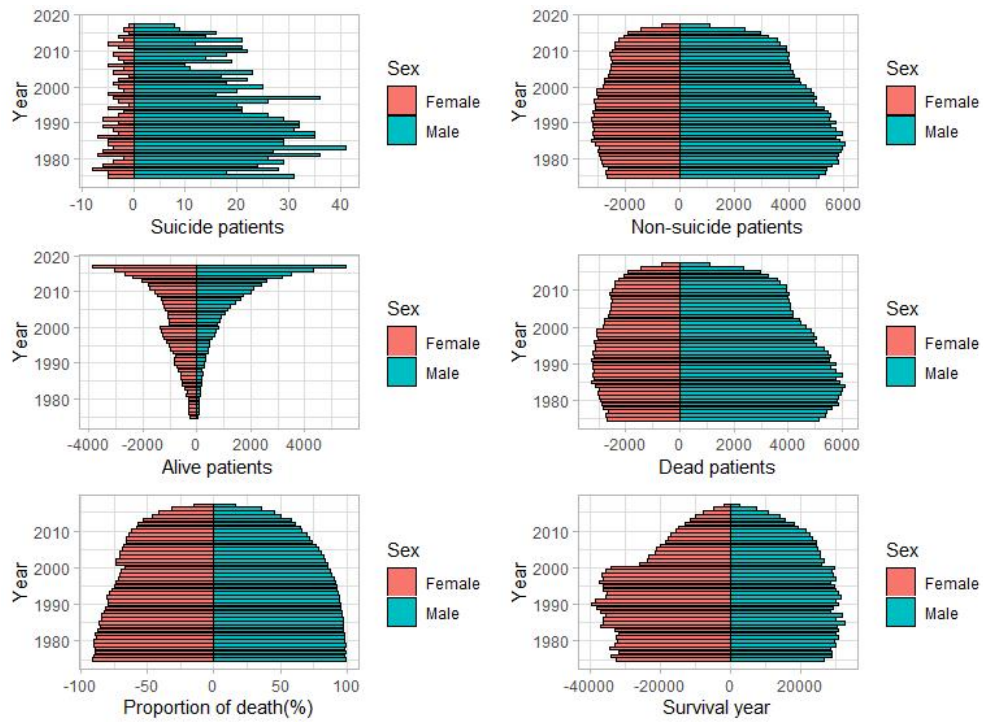

eFigure 3. The distribution of patients with squamous cell carcinoma by year.

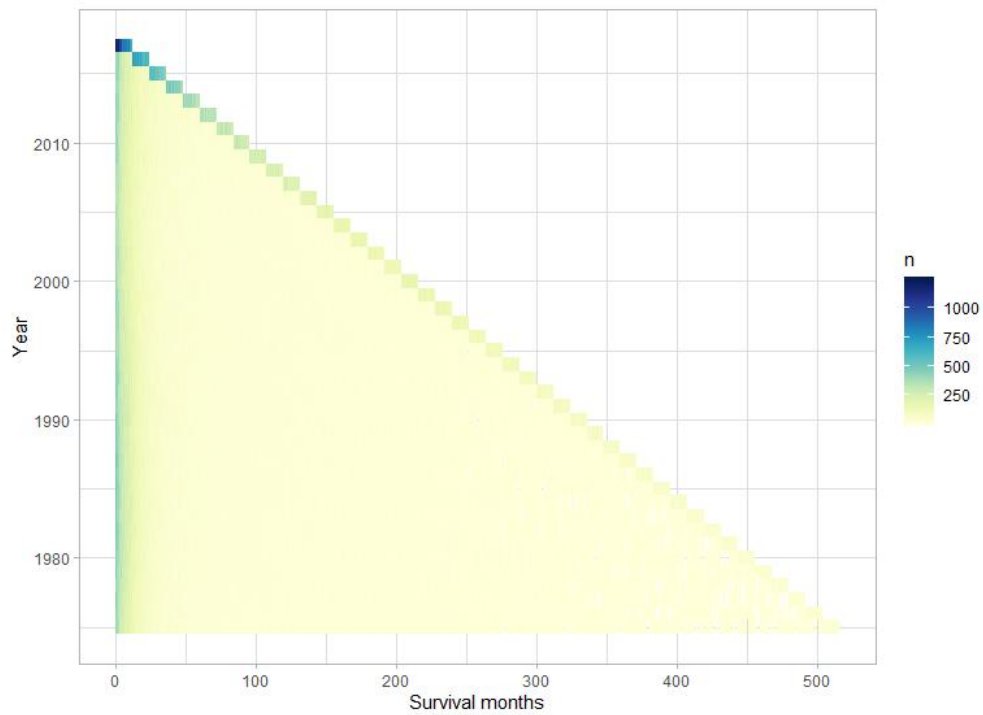

eFigure 4. The distribution of survival months of patients with squamous cell carcinoma in different years.

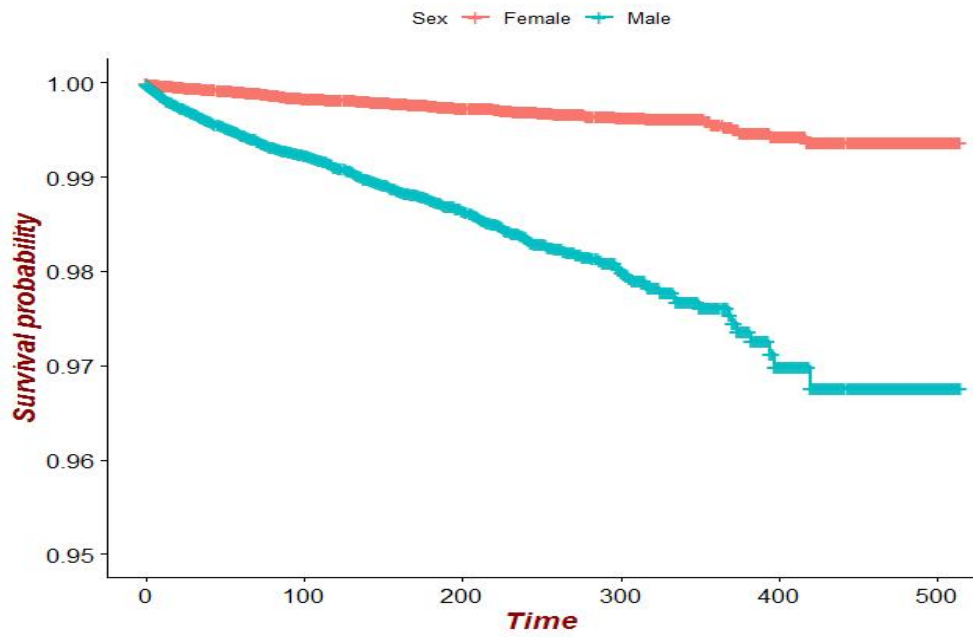

eFigure 5. Comparison chart of survival curves of male and female squamous cell carcinoma patients.
